# Supplementary material for: Altered respiratory microbiota composition and functionality associated with asthma early in life
Source: BMC Infect Dis. 2020 Sep 22;20:697. doi: 10.1186/s12879-020-05427-3 (PMC7510324; doi:10.1186/s12879-020-05427-3)
Supplement: Supplementary file 3 — Additional file 3: Table S1. Summary of Bacterial and Fungal diversity and Prevalence Among Healthy and Asthmatic Groups Using Kruskal-Wallace P-values and Benjamin-Hochberg Corrected Values. [file 12879_2020_5427_MOESM3_ESM.xlsx]

## Sheet: Sheet2
Table S1. Summary of Bacterial and Fungal diversity and Prevalence Among Healthy and Asthmatic Groups Using Kruskal-Wallace P-values and Benjamin-Hochberg Corrected Values
Bacterial variable	Adult.Asthma RelAbundance	Adult.Healthy RelAbundance	Pediatric.Asthma RelAbundance	Pediatric.Healthy RelAbundance	P.value	P.adj	Adult.Asthma Prevalence	Adult.Healthy Prevalence	Pediatric.Asthma Prevalence	Pediatric.Healthy Prevalence
g__Prevotella	26.4	22.87	2.23	23.71	0	0	100	100	100	100
g__Streptococcus	16.51	7.01	14.18	14.06	0.03	0.04	100	100	100	100
g__Veillonella	8.53	8.27	0.65	10.68	0	0	100	100	100	100
g__Moraxella	0.15	0.02	42.75	0.05	0	0	70	55.56	100	100
g__Neisseria	9.62	6.19	1.41	8.97	0	0.01	100	100	100	100
g__Fusobacterium	5.48	9.66	0.93	5.92	0	0	100	100	70	100
g__Porphyromonas	2.88	7.06	0.54	3.34	0	0	100	100	90	100
g__[Prevotella]c	1.99	4.55	0.5	5.11	0	0	100	100	80	100
g__Rothia	3.02	1.38	0.23	0.73	0	0	100	100	100	100
g__Leptotrichia	1.93	3.43	0.36	4.89	0	0	100	100	80	100
g__Oribacterium	0.63	3.29	0.01	0.41	0	0	100	100	10	100
f__[Weeksellaceae]_unclassified	1.34	0.34	0.62	1.41	0	0	100	100	50	100
g__Gemella	0.77	0.34	0.29	1.08	0	0	100	100	90	100
g__Actinomyces	0.8	1.11	0.15	0.78	0	0	100	100	70	100
g__Lautropia	0.59	1.93	0.03	0.35	0	0.01	70	100	40	100
g__Alloiococcus	0	0.01	9.41	0	0	0	30	11.11	100	55.56
g__Campylobacter	0.66	1.53	0.06	0.48	0	0	100	100	40	100
g__Staphylococcus	0	0.01	4.85	0	0	0	40	77.78	100	66.67
g__Granulicatella	0.86	0.56	0.29	0.76	0.02	0.03	100	100	90	100
g__Eikenella	0.11	0.21	0.44	0.37	0.01	0.02	80	100	50	100
g__Megasphaera	0.29	0.42	0.01	0.33	0	0	100	100	20	100
g__Streptobacillus	0.1	0.04	0.03	0.72	0	0.01	20	33.33	70	100
c__TM7-3_unclassified	0.28	0.55	0	0.45	0	0	100	100	30	100
g__Capnocytophaga	0.81	0.83	0.33	0.47	0.02	0.03	80	100	70	100
f__Pasteurellaceae_unclassified	0.16	0.13	0.05	0.45	0.01	0.01	100	77.78	60	100
f__Veillonellaceae_unclassified	0.1	0.09	0.08	0.41	0	0	70	77.78	50	100
g__Paludibacter	0.01	0.69	0	0	0	0	40	100	10	66.67
g__Catonella	0.29	0.47	0.05	0.12	0	0	90	100	30	100
f__Enterobacteriaceae_unclassified	0.13	0.01	0.04	0	0.04	0.05	40	88.89	70	11.11
g__Selenomonas	0.26	1.03	0.04	0.44	0	0	100	100	50	100
g__Lachnoanaerobaculum	0.22	0.25	0.02	0.4	0	0	100	100	50	100
g__Escherichia	0	0.01	0.04	0	0.04	0.05	20	77.78	50	22.22
g__Treponema	0.2	2.49	0.01	0.03	0	0	80	100	20	88.89
g__Akkermansia	0.01	0.18	0.01	0.02	0	0	70	100	70	100
f__S24-7_unclassified	0.01	0.12	0.03	0.04	0	0	90	100	100	100
g__Atopobium	0.13	0.1	0	0.11	0	0	100	100	20	100
p__SR1_unclassified	0.47	0.4	0.02	0.17	0.02	0.03	30	77.78	40	100
g__Moryella	0.19	0.13	0.02	0.15	0	0	100	100	40	100
g__Blautia	0	0.08	0.03	0.01	0	0	10	100	40	66.67
k__Bacteria_unclassified	0.1	0.22	0.01	0.17	0	0	90	88.89	40	100
g__Mycoplasma	0.2	0.06	0	0	0	0	90	66.67	10	44.44
g__Dialister	0.14	0.23	0.01	0.02	0	0	90	100	20	77.78
g__Parvimonas	0.12	0.21	0	0.02	0	0	90	100	30	66.67
g__Filifactor	0.04	0.31	0	0.01	0	0	70	88.89	0	44.44
g__Tannerella	0.04	0.41	0.01	0.02	0	0	80	100	20	88.89
g__Kingella	0.01	0.11	0.01	0.02	0	0	70	88.89	20	100
g__Bulleidia	0.04	0.05	0	0.07	0	0	100	88.89	10	88.89
g__TG5	0.06	0.51	0	0	0	0	50	88.89	10	44.44
f__F16_unclassified	0.04	0.07	0	0.02	0	0	80	88.89	0	88.89
o__Bacteroidales_unclassified	0.07	0.31	0	0	0	0	70	77.78	0	0
g__Pseudomonas	0.01	0.03	0.56	0.01	0	0	50	100	90	33.33
g__Cardiobacterium	0.03	0.06	0.03	0.03	0.01	0.02	70	88.89	20	100
f__Lachnospiraceae_unclassified	0.03	0.06	0	0.11	0	0	80	88.89	20	100
g__Schwartzia	0.02	0.14	0	0	0	0	50	88.89	10	44.44
g__Butyrivibrio	0	0.06	0	0.01	0.02	0.03	40	55.56	0	66.67
g__Peptococcus	0.02	0.06	0	0.01	0.01	0.02	40	88.89	10	55.56
g__Clostridium	0	0.02	0.01	0.01	0	0	10	100	20	77.78
g__Aggregatibacter	0	0.01	0.01	0.02	0.01	0.02	30	66.67	30	100
g__Sutterella	0	0.03	0	0.01	0	0	10	100	0	66.67
p__Bacteroidetes_unclassified	0.02	0.11	0	0	0.03	0.04	50	66.67	10	33.33
f__[Mogibacteriaceae]_unclassified	0.04	0.07	0	0.01	0	0.01	70	100	20	88.89
g__Mogibacterium	0.01	0.03	0.01	0.01	0	0	90	100	10	77.78
f__Rs-045_unclassified	0	0.03	0	0	0	0	40	77.78	0	22.22
g__Shuttleworthia	0.01	0.02	0	0	0.01	0.01	50	77.78	10	22.22
g__Lactobacillus	0.01	0.02	0	0.01	0.03	0.04	60	100	50	88.89
o__RF39_unclassified	0.01	0.03	0	0.01	0.02	0.03	20	66.67	0	22.22
g__Bifidobacterium	0.01	0	0	0	0.02	0.03	60	66.67	20	22.22
g__Sphingobium	0	0	0.02	0	0.01	0.02	0	55.56	50	11.11
Fungal variable	Adult.Asthma RelAbundance	Adult.Healthy RelAbundance	Pediatric.Asthma RelAbundance	Pediatric.Healthy RelAbundance	P.value	P.adj	Adult.Asthma Prevalence	Adult.Healthy Prevalence	Pediatric.Asthma Prevalence	Pediatric.Healthy Prevalence
k__Fungi_unclassified	5.4	79.72	11.84	91.25	0	0	100	100	100	100
g__Candida	41.92	0.62	12.13	0.36	0.02	0.03	100	80	77.78	66.67
g__Malassezia	27.04	2.02	64.69	2.94	0	0	100	100	100	100
p__Basidiomycota_unclassified	0	0.83	0	0.59	0	0	33.33	100	0	100
c__Agaricomycetes_unclassified	0	0.94	0	0.1	0	0	11.11	80	11.11	77.78
g__unclassified_Malasseziales	0.01	0	1.5	0.36	0.02	0.03	11.11	0	11.11	55.56
g__Aspergillus	0.71	0	0.77	0	0	0.01	77.78	10	44.44	11.11
